# Supplementary material for: Versatile nanobead-scaffolded N-SnO2mesoporous microspheres: one-step synthesis and superb performance in dye-sensitized solar cell, gas sensor, and photocatalytic degradation of dye
Source: Royal Society of Chemistry journal article supplement (doi:10.1039/c2ta00103a), 2012-09-25
Supplement: c2ta00103a.pdf [file c2ta00103a.pdf]

## Electronic Supplementary Information

# Versatile Nanobeads-Scaffolded N-SnO<sub>2</sub> Mesoporous Microspheres: One-Step Synthesis and Superb Performance in Dye-Sensitized Solar Cell, Gas Sensor, and Photocatalytic Degradation of Dye

Zhengdao Li,<sup>a,c</sup> Yong Zhou,<sup>\*a,b</sup> Jingchao Song,<sup>d</sup> Tao Yu,<sup>a,b</sup> Jianguo Liu,<sup>a,c</sup> Zhigang Zou,<sup>\*a,b,c</sup>

<sup>a</sup> National Laboratory of Solid State Microstructures, Eco-Materials and Renewable Energy Research Center (ERERC), Nanjing University, Nanjing 210093, P. R. China. E-mail: [zhouyong1999@nju.edu.cn](mailto:zhouyong1999@nju.edu.cn)

<sup>b</sup> School of Physics, Nanjing University, Nanjing 210093, P. R. China.

E-mail: [zgzou@nju.edu.cn](mailto:zgzou@nju.edu.cn)

<sup>c</sup> Department of Materials Science and Engineering, Nanjing University, Nanjing 210093, P. R. China.

<sup>d</sup> Department of Materials Engineering, Monash University, Wellington Road, Clayton, VICTORIA 3800, Australia

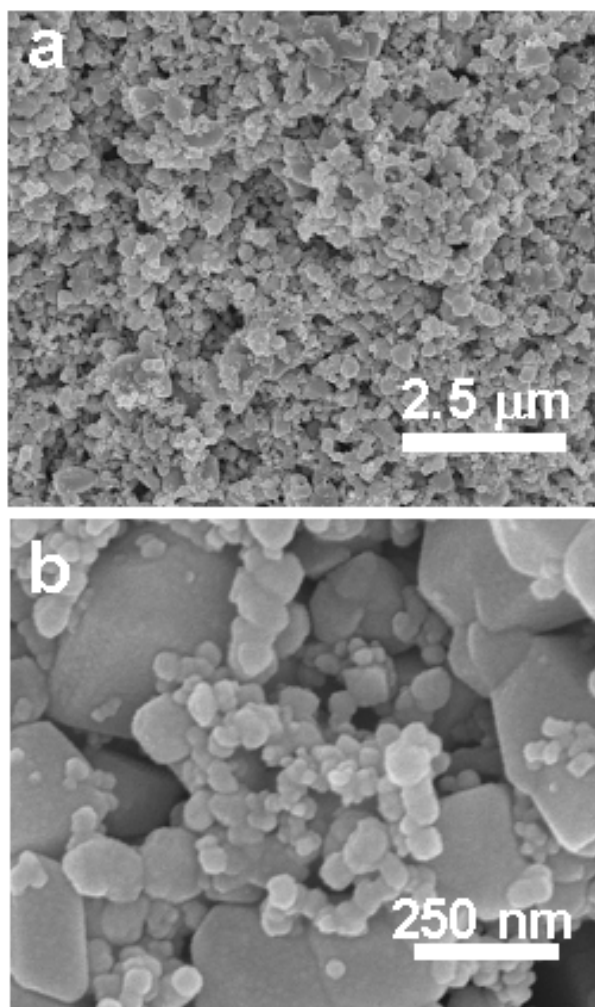

**Figure S1.** FE-SEM images of the CNPs at different magnification.

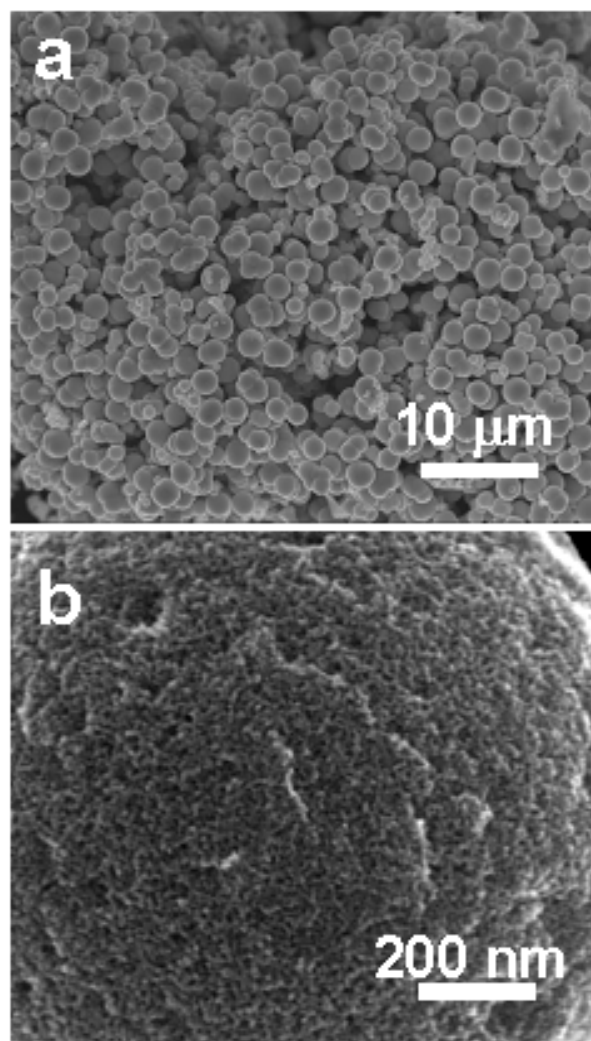

**Figure S2.** FE-SEM images of the product after annealing the NSMMs at 500 °C for 0.5 h.

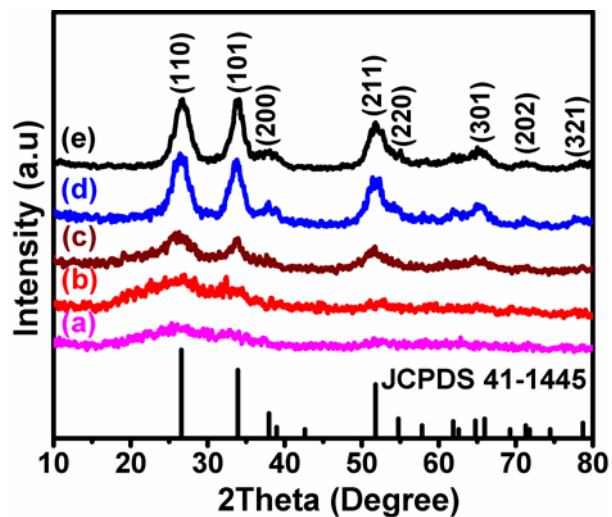

**Figure S3.** XRD patterns of the samples. (a) 2 h, (b) 4 h, (c) pure water as the solvent, and (d) without  $C_6H_{12}O_6$ , (e) 8 h. NOTE: for simplicity, only major diffraction peaks were indexed.

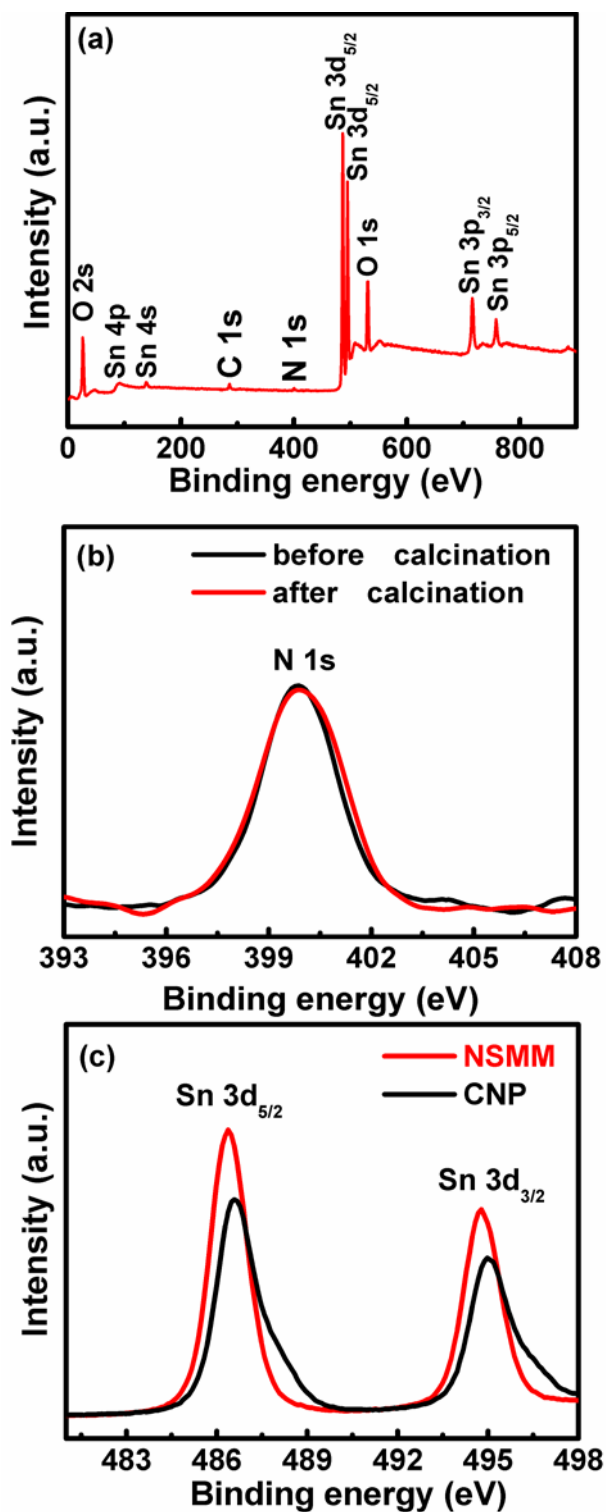

**Figure S4.** The typical XPS spectra of the NSMMs: (a) the survey spectra, (b) the high-resolution spectra of N 1s. (c) the high-resolution spectra of Sn 3d.

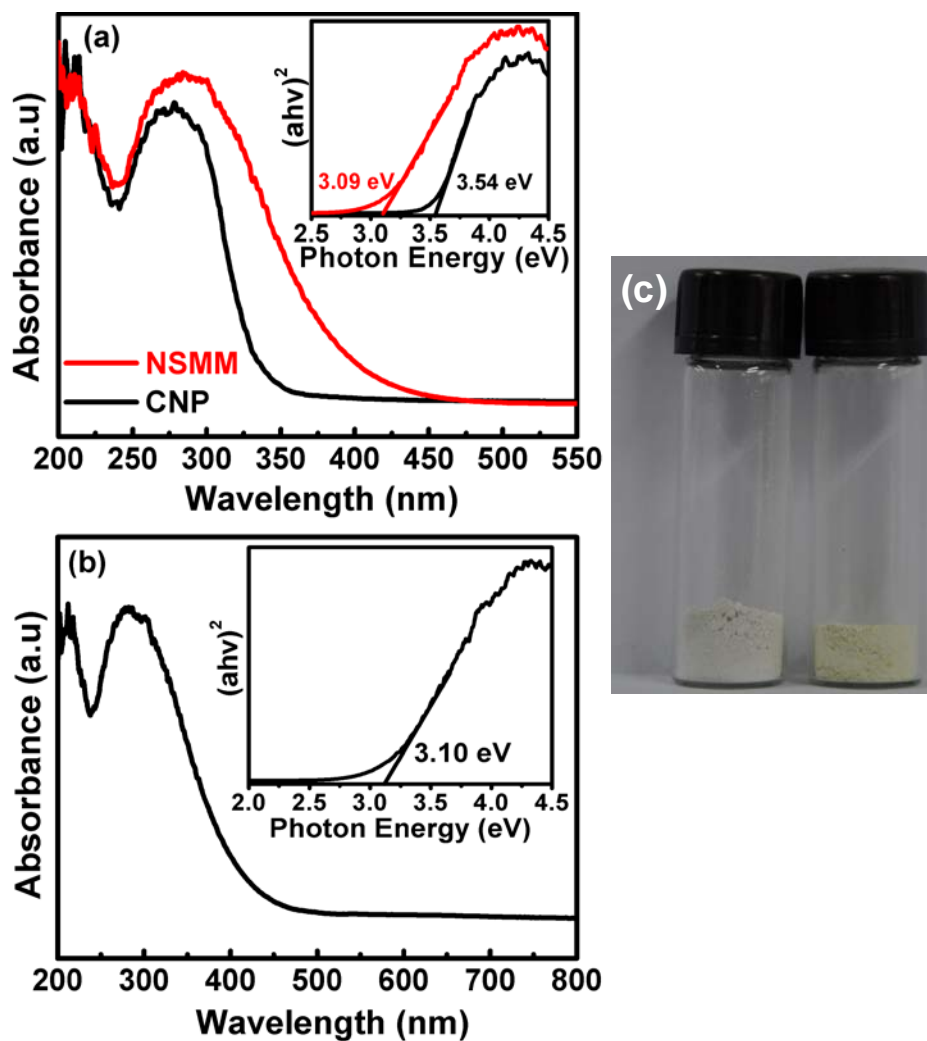

**Figure S5.** (a) UV-vis absorption spectrum of the two samples. (b) UV-vis absorption spectrum of NSMM after calcination. (c) The photo images of the CNP (left) and NSMM (right).

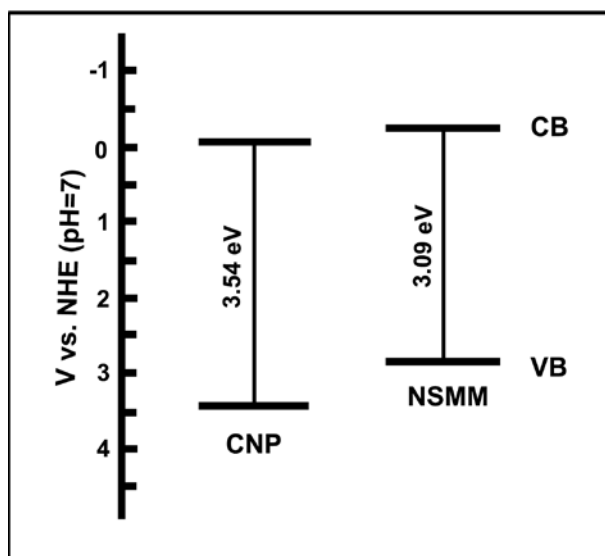

**Figure S6.** Energy band diagram of the two samples.

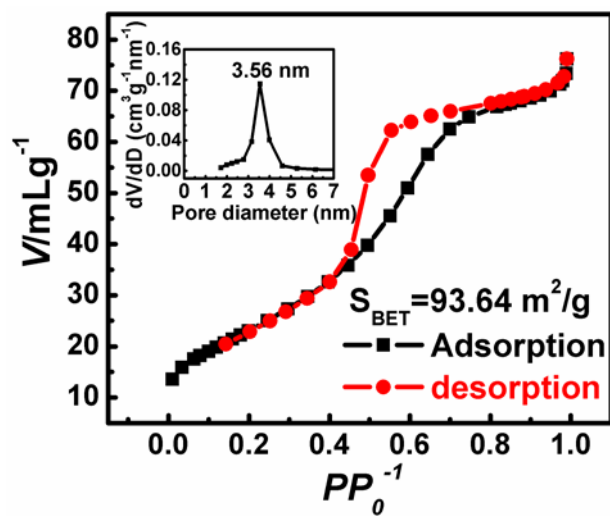

**Figure S7.** Nitrogen sorption isotherms of the NSMMs. Inset shows the pore diameter distribution of NMSS.



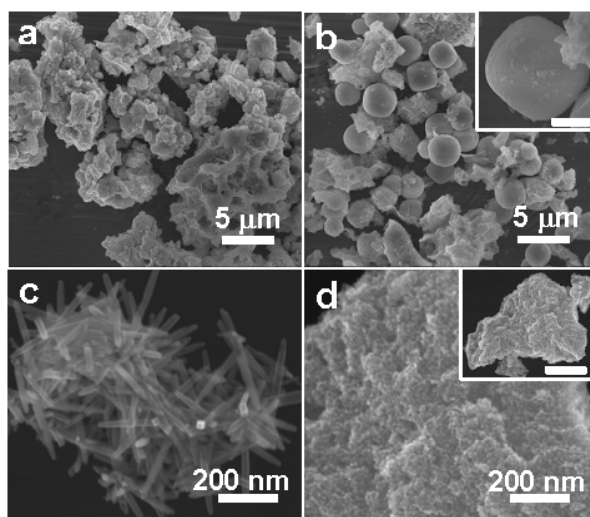

**Figure S8.** Morphology evolution of NSMM (a) 2 h, (b) 4 h; FE-SEM image of (c) SnO<sub>2</sub> nanorods formed without C<sub>6</sub>H<sub>12</sub>O<sub>6</sub>, (d) SnO<sub>2</sub> bulks formed with pure H<sub>2</sub>O as solvent.

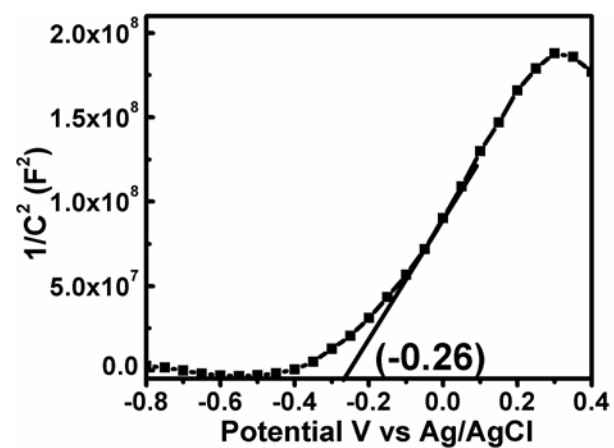

**Figure S9.** Mott-Schottky plots of the NSMMs electrodes after calcination..

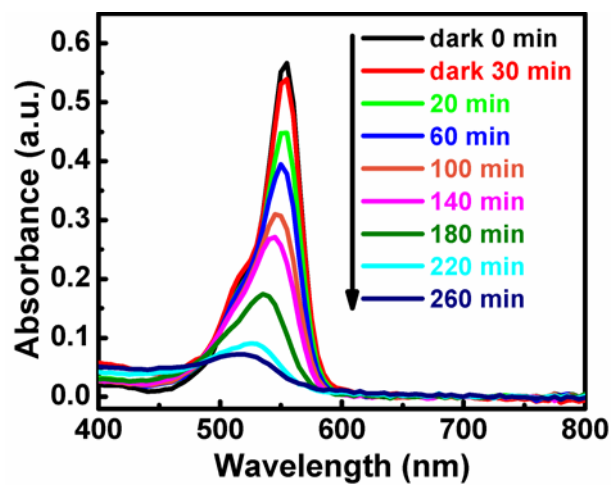

**Figure S10.** Time-dependent UV-vis absorbance spectra of the RhB solution in the presence of CNP sample.
